# Supplementary material for: Life History of the Arctic Squid Gonatus fabricii (Cephalopoda: Oegopsida) Reconstructed by Analysis of Individual Ontogenetic Stable Isotopic Trajectories
Source: MDPI journal article supplement (doi:10.3390/ani12243548), 2022-12-15

**Table S1.** All individuals of *Gonatus fabricii*, analysed for this study ( $n = 29$ ): location, data, depth, sex, maturity stage, mantle length and upper beak measurements: rostrum length and crest length. ML – mantle length, URL – upper beak rostrum length, UCL – upper beak crest length, SIA – stable isotope analysis, n/a – no results, --- – not applicable.

| Squid           | Coordinates          | Data       | Depth,<br>m | Sex    | Maturity<br>stage | ML,<br>mm | Upper beak<br>measurements |                    | SIA |
|-----------------|----------------------|------------|-------------|--------|-------------------|-----------|----------------------------|--------------------|-----|
|                 |                      |            |             |        |                   |           | URL,<br>mm                 | UCL, mm            |     |
| F1              | 69.22° N<br>51.45° W | 12/06/2017 | 407.0       | Female | III               | 214       | 5.90                       | 19.22              | yes |
| F2              | 69.22° N<br>51.45° W | 12/06/2017 | 407.0       | Female | III               | 215       | 3.97 <sup>2</sup>          | 18.87              | yes |
| F3              | 67.46° N<br>62.05° W | 08/10/2016 | 1110.0      | Female | III               | 238       | 5.60 <sup>2</sup>          | 20.49 <sup>2</sup> | yes |
| F4              | 63.59° N<br>56.56° W | 08/09/2016 | 1443.0      | Female | III               | 249       | 5.49                       | 22.02              | yes |
| F5              | 69.47° N<br>65.07° W | 15/10/2016 | 665.0       | Female | III               | 257       | 5.48                       | 19.23              | yes |
| F6 <sup>1</sup> | 70.69° N<br>61.17° W | 12/07/2019 | 1105.0      | Female | VI                | 230       | 5.17                       | 18.82 <sup>2</sup> | yes |
| F7              | 69.06° N<br>51.62° W | 08/06/2017 | 430.0       | Female | II                | 205       | 5.15                       | 18.18              | no  |
| F8              | 73.76° N<br>61.67° W | 25/09/2017 | 584.0       | Female | II                | 222       | 5.74                       | 20.08              | no  |
| F9              | 69.28° N<br>52.79° W | 09/08/2017 | 507.5       | Female | III               | 212       | 4.60                       | 18.53              | no  |
| F10             | 69.28° N<br>52.79° W | 09/08/2017 | 507.5       | Female | III               | 212       | 5.38                       | 18.22              | no  |
| F11             | 67.05° N<br>58.56° W | 18/10/2016 | 1237.0      | Female | III               | 244       | 5.19 <sup>2</sup>          | 21.70              | no  |
| F12             | 64.33° N<br>59.00° W | 04/11/2016 | 522.0       | Female | III               | 306       | 6.80                       | 22.69              | no  |
| M1              | 69.22° N<br>51.45° W | 12/06/2017 | 407.0       | Male   | III               | 216       | 5.26                       | 18.26              | yes |
| M2              | 64.02° N<br>57.27° W | 17/10/2017 | 944.5       | Male   | III               | 221       | 4.53                       | 17.55              | yes |
| M3              | 72.01° N<br>71.04° W | 13/10/2016 | 1326.0      | Male   | IV                | 269       | 6.57                       | 20.86              | yes |
| M4              | 61.99° N<br>50.01° W | 25/07/2017 | 1232.0      | Male   | V <sub>2</sub>    | 285       | 6.69                       | 24.11              | yes |
| M5              | 64.33° N<br>55.64° W | 09/08/2019 | 1059.5      | Male   | V <sub>2</sub>    | 252       | 5.48                       | 19.85              | yes |
| M6              | 67.92° N<br>58.62° W | 29/08/2017 | 384.5       | Male   | V <sub>3</sub>    | 284       | 5.37                       | 22.01              | yes |
| M7              | 64.39° N<br>55.10° W | 29/10/2016 | 1049.0      | Male   | V <sub>3</sub>    | 298       | 5.93                       | 21.58 <sup>2</sup> | yes |
| M8              | 67.24° N<br>60.38° W | 07/10/2016 | 1148.0      | Male   | V <sub>3</sub>    | 325       | 5.87                       | 21.59              | yes |
| M9              | 69.22° N<br>51.45° W | 12/06/2017 | 407.0       | Male   | III               | 208       | 4.74                       | 19.10              | no  |
| M10             | 69.28° N<br>52.79° W | 09/08/2017 | 507.5       | Male   | III               | 218       | 4.87                       | 18.81              | no  |
| M11             | 69.23° N<br>53.16° W | 14/06/2016 | 489.5       | Male   | IV                | 241       | 6.09                       | 19.81              | no  |
| M12             | 63.32° N<br>56.16° W | 08/09/2016 | 1428.5      | Male   | IV                | 261       | 5.56                       | 19.53              | no  |
| M13             | 69.23° N             | 14/06/2016 | 489.5       | Male   | V <sub>1</sub>    | 236       | 5.96                       | 20.97              | no  |

|     |                      |            |        |      |                |     |                   |       |    |
|-----|----------------------|------------|--------|------|----------------|-----|-------------------|-------|----|
|     | 53.16° W             |            |        |      |                |     |                   |       |    |
| M14 | 66.55° N<br>58.03° W | 18/10/2016 | 957.0  | Male | V <sub>2</sub> | 221 | 5.79 <sup>2</sup> | 21.11 | no |
| M15 | 70.33° N<br>66.10° W | 12/10/2016 | 1102.0 | Male | V <sub>2</sub> | 241 | 5.86              | 19.49 | no |
| M16 | 64.16° N<br>57.05° W | 06/09/2016 | 769.0  | Male | V <sub>3</sub> | 232 | 5.77              | 24.02 | no |
| M17 | 67.46° N<br>62.05° W | 08/10/2016 | 1110.0 | Male | V <sub>3</sub> | 256 | 4.03              | 21.03 | no |

<sup>1</sup>gelatinous degeneration;

<sup>2</sup>damaged, not used for equation.

**Table S2.** Data on *Gonatus fabricii*, analysed by stable isotope analysis ( $n = 14$ ), and each of the analysed upper beak subsections ( $n = 179$ ): mantle length, sex, maturity stage, number and size of subsections, mass C:N ratio, values of  $\delta^{13}\text{C}$  and  $\delta^{15}\text{N}$ , estimated trophic level, and estimated mantle length and mass at given beak size. ML – mantle length, TL – estimated trophic level, n/a – no results, --- – not applicable.

| Squid |                           | Subsections |        |        |        |        |        |        |        |        |        |        |        |        |        |        |     |     |
|-------|---------------------------|-------------|--------|--------|--------|--------|--------|--------|--------|--------|--------|--------|--------|--------|--------|--------|-----|-----|
|       | Number                    | 1           | 2      | 3      | 4      | 5      | 6      | 7      | 8      | 9      | 10     | 11     | 12     | 13     | 14     | 15     | 16  | 17  |
| F1    | Size, mm                  | 0.91        | 0.91   | 0.91   | 0.91   | 0.91   | 0.91   | 0.91   | 0.91   | 0.91   | 1.64   | 1.64   | 1.64   | 1.64   | ---    | ---    | --- | --- |
|       | C:N ratio                 | 3.61        | 3.64   | 3.48   | 3.40   | 3.20   | 3.47   | 3.14   | 3.16   | 3.21   | 3.14   | 3.20   | 3.39   | 3.78   | ---    | ---    | --- | --- |
|       | $\delta^{13}\text{C}$ , ‰ | -20.47      | -20.28 | -19.95 | -19.78 | -18.89 | -18.74 | -18.60 | -18.76 | -18.80 | -18.76 | -18.79 | -18.73 | -18.65 | ---    | ---    | --- | --- |
|       | $\delta^{15}\text{N}$ , ‰ | 9.01        | 7.94   | 9.89   | 10.07  | 12.26  | 11.70  | 13.33  | 13.36  | 13.32  | 13.54  | 13.49  | 12.94  | 13.08  | ---    | ---    | --- | --- |
|       | TL                        | 3.29        | 3.01   | 3.52   | 3.57   | 4.15   | 4.00   | 4.43   | 4.44   | 4.43   | 4.48   | 4.47   | 4.33   | 4.36   | ---    | ---    | --- | --- |
|       | Est. ML, mm               | 7.0         | 11.7   | 17.5   | 24.0   | 31.3   | 39.2   | 47.6   | 56.6   | 66.0   | 84.0   | 103.2  | 123.6  | 145.0  | 167.4  | ---    | --- | --- |
|       | Est. mass, g              | 0.03        | 0.11   | 0.32   | 0.72   | 1.42   | 2.53   | 4.18   | 6.51   | 9.67   | 18.00  | 30.61  | 48.68  | 73.48  | 106.37 | ---    | --- | --- |
| F2    | Number                    | 1           | 2      | 3      | 4      | 5      | 6      | 7      | 8      | 9      | 10     | 11     | 12     | 13     | 14     | 15     | 16  | 17  |
|       | Size, mm                  | 0.90        | 0.90   | 0.90   | 0.90   | 0.90   | 0.90   | 0.90   | 0.90   | 0.90   | 1.63   | 1.63   | 1.63   | 1.63   | ---    | ---    | --- | --- |
|       | C:N ratio                 | n/a         | n/a    | n/a    | n/a    | n/a    | n/a    | n/a    | n/a    | n/a    | n/a    | n/a    | n/a    | 3.69   | ---    | ---    | --- | --- |
|       | $\delta^{13}\text{C}$ , ‰ | -20.41      | -20.25 | -20.47 | -20.13 | -20.12 | -20.01 | -20.00 | -19.44 | -19.56 | -19.74 | -19.72 | -19.72 | -19.70 | ---    | ---    | --- | --- |
|       | $\delta^{15}\text{N}$ , ‰ | 8.63        | 10.17  | 8.79   | 9.32   | 11.68  | 10.44  | 11.76  | 13.53  | 12.85  | 13.21  | 13.16  | 13.04  | 12.21  | ---    | ---    | --- | --- |
|       | TL                        | 3.19        | 3.60   | 3.23   | 3.37   | 4.00   | 3.67   | 4.01   | 4.48   | 4.30   | 4.40   | 4.39   | 4.35   | 4.13   | ---    | ---    | --- | --- |
|       | Est. ML, mm               | 7.0         | 11.6   | 17.3   | 23.7   | 30.9   | 38.7   | 47.0   | 55.8   | 65.0   | 82.8   | 101.9  | 122.1  | 143.3  | 165.5  | ---    | --- | --- |
| F3    | Est. mass, g              | 0.03        | 0.11   | 0.31   | 0.70   | 1.37   | 2.45   | 4.04   | 6.28   | 9.32   | 17.38  | 29.61  | 47.15  | 71.24  | 103.21 | ---    | --- | --- |
|       | Number                    | 1           | 2      | 3      | 4      | 5      | 6      | 7      | 8      | 9      | 10     | 11     | 12     | 13     | 14     | 15     | 16  | 17  |
|       | Size, mm                  | 0.95        | 0.95   | 0.95   | 0.95   | 0.95   | 0.95   | 0.95   | 0.95   | 0.95   | 0.95   | 1.91   | 1.91   | 1.91   | 1.91   | 1.91   | --- | --- |
|       | C:N ratio                 | 3.54        | 3.43   | 3.41   | 3.31   | n/a    | 3.47   | 3.75   | n/a    | n/a    | 3.19   | 3.17   | n/a    | 3.13   | 3.12   | 3.52   | --- | --- |
|       | $\delta^{13}\text{C}$ , ‰ | -20.52      | -20.37 | -19.76 | -19.47 | n/a    | -20.20 | -19.35 | n/a    | n/a    | -19.23 | -19.29 | n/a    | -19.06 | -18.92 | -19.10 | --- | --- |
|       | $\delta^{15}\text{N}$ , ‰ | 10.74       | 11.71  | 12.84  | 12.76  | 14.50  | 10.32  | 14.54  | n/a    | n/a    | 15.43  | 15.81  | n/a    | 16.74  | 16.39  | 15.04  | --- | --- |
|       | TL                        | 3.75        | 4.00   | 4.30   | 4.28   | 4.74   | 3.64   | 4.75   | n/a    | n/a    | 4.98   | 5.08   | n/a    | 5.33   | 5.23   | 4.88   | --- | --- |
| F4    | Est. ML, mm               | 7.2         | 12.2   | 18.3   | 25.3   | 33.0   | 41.4   | 50.3   | 59.8   | 69.8   | 80.2   | 102.5  | 126.3  | 151.5  | 178.0  | 205.7  | --- | --- |
|       | Est. mass, g              | 0.03        | 0.12   | 0.36   | 0.82   | 1.63   | 2.91   | 4.82   | 7.52   | 11.19  | 16.01  | 30.06  | 51.46  | 82.20  | 124.50 | 180.71 | --- | --- |
|       | Number                    | 1           | 2      | 3      | 4      | 5      | 6      | 7      | 8      | 9      | 10     | 11     | 12     | 13     | 14     | 15     | 16  | 17  |
|       | Size, mm                  | 1.0         | 1.0    | 1.0    | 1.0    | 1.0    | 1.0    | 1.0    | 1.0    | 1.0    | 1.0    | 2.0    | 2.0    | 2.0    | 2.0    | ---    | --- | --- |
|       | C:N ratio                 | n/a         | n/a    | 3.72   | 3.24   | 3.14   | n/a    | n/a    | 3.16   | 3.16   | n/a    | n/a    | n/a    | n/a    | 3.21   | ---    | --- | --- |
|       | $\delta^{13}\text{C}$ , ‰ | n/a         | n/a    | -19.33 | -19.37 | -18.62 | n/a    | n/a    | -18.94 | -18.96 | n/a    | n/a    | n/a    | n/a    | -19.27 | ---    | --- | --- |
|       | $\delta^{15}\text{N}$ , ‰ | n/a         | 6.41   | 13.91  | 15.49  | 11.45  | n/a    | n/a    | 11.76  | 11.82  | n/a    | 11.07  | 11.55  | 10.75  | 15.26  | ---    | --- | --- |
| F5    | TL                        | n/a         | 3.03   | 5.00   | 5.42   | 4.35   | n/a    | n/a    | 4.44   | 4.45   | n/a    | 4.25   | 4.38   | 4.17   | 5.36   | ---    | --- | --- |
|       | Est. ML, mm               | 7.4         | 12.8   | 19.3   | 26.8   | 35.2   | 44.2   | 53.8   | 64.0   | 74.7   | 85.9   | 109.7  | 135.1  | 162.0  | 190.3  | 219.9  | --- | --- |
| F5    | Est. mass, g              | 0.04        | 0.14   | 0.41   | 0.96   | 1.91   | 3.44   | 5.72   | 8.94   | 13.32  | 19.09  | 35.80  | 61.22  | 97.74  | 147.94 | 214.62 | --- | --- |
|       | Number                    | 1           | 2      | 3      | 4      | 5      | 6      | 7      | 8      | 9      | 10     | 11     | 12     | 13     | 14     | 15     | 16  | 17  |

|                 |                           |        |        |        |        |        |        |        |        |        |        |        |        |        |        |        |     |     |
|-----------------|---------------------------|--------|--------|--------|--------|--------|--------|--------|--------|--------|--------|--------|--------|--------|--------|--------|-----|-----|
|                 | Size, mm                  | 0.97   | 0.97   | 0.97   | 0.97   | 0.97   | 0.97   | 0.97   | 0.97   | 0.97   | 1.74   | 1.74   | 1.74   | 1.74   | ---    | ---    | --- | --- |
|                 | C:N ratio                 | n/a    | n/a    | n/a    | 3.34   | 3.38   | 3.19   | 3.14   | 3.16   | 3.16   | n/a    | 3.19   | 3.30   | 3.44   | ---    | ---    | --- | --- |
|                 | $\delta^{13}\text{C}$ , ‰ | n/a    | n/a    | n/a    | -19.77 | -19.68 | -19.00 | -19.03 | -19.23 | -19.28 | n/a    | -19.10 | -19.08 | -19.16 | ---    | ---    | --- | --- |
|                 | $\delta^{15}\text{N}$ , ‰ | n/a    | n/a    | n/a    | 13.68  | 15.10  | 15.42  | 16.22  | 16.11  | 16.09  | 15.75  | 16.30  | 16.12  | 15.28  | ---    | ---    | --- | --- |
|                 | TL                        | n/a    | n/a    | n/a    | 4.52   | 4.89   | 4.98   | 5.19   | 5.16   | 5.15   | 5.07   | 5.21   | 5.16   | 4.94   | ---    | ---    | --- | --- |
|                 | Est. ML, mm               | 7.3    | 12.4   | 18.7   | 25.9   | 33.9   | 42.5   | 51.7   | 61.5   | 71.8   | 91.3   | 112.3  | 134.4  | 157.7  | 182.1  | ---    | --- | --- |
|                 | Est. mass, g              | 0.03   | 0.13   | 0.38   | 0.87   | 1.74   | 3.11   | 5.17   | 8.07   | 12.01  | 22.35  | 38.02  | 60.46  | 91.25  | 132.08 | ---    | --- | --- |
|                 | Number                    | 1      | 2      | 3      | 4      | 5      | 6      | 7      | 8      | 9      | 10     | 11     | 12     | 13     | 14     | 15     | 16  | 17  |
|                 | Size, mm                  | 0.94   | 0.94   | 0.94   | 0.94   | 0.94   | 0.94   | 0.94   | 0.94   | 0.94   | 0.94   | 1.88   | 1.88   | 1.88   | 1.88   | 1.88   | --- | --- |
| F6 <sup>1</sup> | C:N ratio                 | 3.60   | 3.39   | 3.4    | 3.16   | 3.13   | 3.11   | 3.11   | 3.07   | 3.05   | 3.15   | 3.16   | 3.16   | 3.15   | 3.16   | 3.22   | --- | --- |
|                 | $\delta^{13}\text{C}$ , ‰ | -20.24 | -19.79 | -18.89 | -19.26 | -19.21 | -19.16 | -19.12 | -19.19 | -19.15 | -19.13 | -19.22 | -19.11 | -18.85 | -18.61 | -18.53 | --- | --- |
|                 | $\delta^{15}\text{N}$ , ‰ | 11.17  | 11.86  | 13.08  | 13.83  | 14.39  | 15.66  | 15.52  | 16.09  | 16.12  | 15.67  | 15.59  | 16.54  | 16.54  | 16.13  | 16.75  | --- | --- |
|                 | TL                        | 3.65   | 3.83   | 4.15   | 4.35   | 4.50   | 4.83   | 4.80   | 4.94   | 4.95   | 4.83   | 4.81   | 5.06   | 5.06   | 4.96   | 5.12   | --- | --- |
|                 | Est. ML, mm               | 7.2    | 12.1   | 18.1   | 25.0   | 32.6   | 40.8   | 49.7   | 59.0   | 68.8   | 79.1   | 100.9  | 124.2  | 148.9  | 174.8  | 202.0  | --- | --- |
|                 | Est. mass, g              | 0.03   | 0.12   | 0.35   | 0.79   | 1.57   | 2.81   | 4.66   | 7.26   | 10.79  | 15.44  | 28.90  | 49.33  | 78.66  | 118.96 | 172.47 | --- | --- |
|                 | Number                    | 1      | 2      | 3      | 4      | 5      | 6      | 7      | 8      | 9      | 10     | 11     | 12     | 13     | 14     | 15     | 16  | 17  |
|                 | Size, mm                  | 0.99   | 0.99   | 0.99   | 0.99   | 0.99   | 0.99   | 0.99   | 0.99   | 1.99   | 1.99   | 1.99   | 1.99   | ---    | ---    | ---    | --- | --- |
|                 | C:N ratio                 | 3.56   | n/a    | 3.50   | 3.25   | 3.22   | n/a    | 3.23   | n/a    | 3.27   | 3.25   | 3.57   | 3.50   | ---    | ---    | ---    | --- | --- |
| M1              | $\delta^{13}\text{C}$ , ‰ | -20.13 | n/a    | -19.55 | -18.53 | -18.63 | n/a    | -18.95 | n/a    | -18.86 | -18.75 | -18.82 | -19.08 | ---    | ---    | ---    | --- | --- |
|                 | $\delta^{15}\text{N}$ , ‰ | 8.94   | n/a    | 9.77   | 11.65  | 13.15  | n/a    | 13.51  | n/a    | 13.83  | 14.35  | 13.82  | 13.45  | ---    | ---    | ---    | --- | --- |
|                 | TL                        | 3.27   | n/a    | 3.49   | 3.99   | 4.38   | n/a    | 4.48   | n/a    | 4.56   | 4.70   | 4.56   | 4.46   | ---    | ---    | ---    | --- | --- |
|                 | Est. ML, mm               | 7.4    | 12.7   | 19.1   | 26.5   | 34.7   | 43.6   | 53.1   | 63.1   | 84.8   | 108.2  | 133.3  | 159.8  | ---    | ---    | ---    | --- | --- |
|                 | Est. mass, g              | 0.04   | 0.14   | 0.41   | 0.97   | 1.94   | 3.49   | 5.82   | 9.11   | 19.53  | 36.72  | 62.96  | 100.73 | ---    | ---    | ---    | --- | --- |
|                 | Number                    | 1      | 2      | 3      | 4      | 5      | 6      | 7      | 8      | 9      | 10     | 11     | 12     | 13     | 14     | 15     | 16  | 17  |
|                 | Size, mm                  | 0.97   | 0.97   | 0.97   | 0.97   | 0.97   | 0.97   | 0.97   | 0.97   | 1.93   | 1.93   | 1.93   | ---    | ---    | ---    | ---    | --- | --- |
|                 | C:N ratio                 | 3.61   | 3.52   | 3.38   | 3.35   | 3.21   | 3.09   | 3.16   | 3.22   | 3.14   | 3.27   | 3.49   | ---    | ---    | ---    | ---    | --- | --- |
|                 | $\delta^{13}\text{C}$ , ‰ | -21.18 | -20.85 | -20.47 | -19.99 | -19.28 | -19.37 | -19.40 | -19.47 | -19.45 | -19.45 | -19.59 | ---    | ---    | ---    | ---    | --- | --- |
| M2              | $\delta^{15}\text{N}$ , ‰ | 6.12   | 6.30   | 7.03   | 8.22   | 11.02  | 11.68  | 11.72  | 10.69  | 12.24  | 12.36  | 11.98  | ---    | ---    | ---    | ---    | --- | --- |
|                 | TL                        | 2.95   | 3.00   | 3.19   | 3.51   | 4.24   | 4.42   | 4.43   | 4.15   | 4.56   | 4.59   | 4.49   | ---    | ---    | ---    | ---    | --- | --- |
|                 | Est. ML, mm               | 7.3    | 12.4   | 18.7   | 25.9   | 33.9   | 42.5   | 51.7   | 61.5   | 82.4   | 105.0  | 129.2  | 154.9  | ---    | ---    | ---    | --- | --- |
|                 | Est. mass, g              | 0.03   | 0.14   | 0.39   | 0.91   | 1.82   | 3.27   | 5.44   | 8.51   | 18.14  | 34.00  | 58.16  | 92.88  | ---    | ---    | ---    | --- | --- |
|                 | Number                    | 1      | 2      | 3      | 4      | 5      | 6      | 7      | 8      | 9      | 10     | 11     | 12     | 13     | 14     | 15     | 16  | 17  |
|                 | Size, mm                  | 0.92   | 0.92   | 0.92   | 0.92   | 0.92   | 0.92   | 0.92   | 0.92   | 0.92   | 0.92   | 1.84   | 1.84   | 1.84   | 1.84   | ---    | --- | --- |
|                 | C:N ratio                 | 3.66   | 3.64   | 3.58   | 3.40   | 3.30   | 3.12   | 3.24   | 3.11   | 3.13   | 3.18   | 3.18   | 3.33   | 3.49   | 3.86   | ---    | --- | --- |
|                 | $\delta^{13}\text{C}$ , ‰ | -20.98 | -20.88 | -20.96 | -20.19 | -20.14 | -19.58 | -19.64 | -19.41 | -19.63 | -19.64 | -19.56 | -19.66 | -19.98 | -19.78 | ---    | --- | --- |
|                 | $\delta^{15}\text{N}$ , ‰ | 9.53   | 9.49   | 10.58  | 10.62  | 12.58  | 13.69  | 14.03  | 14.72  | 14.48  | 15.43  | 14.92  | 14.80  | 14.56  | 13.82  | ---    | --- | --- |
| M3              | TL                        | 3.77   | 3.76   | 4.05   | 4.06   | 4.57   | 4.87   | 4.95   | 5.14   | 5.07   | 5.32   | 5.19   | 5.16   | 5.09   | 4.90   | ---    | --- | --- |
|                 | Est. ML, mm               | 7.1    | 11.8   | 17.7   | 24.3   | 31.7   | 39.8   | 48.3   | 57.4   | 66.9   | 76.9   | 98.0   | 120.7  | 144.6  | 169.8  | 196.1  | --- | --- |
|                 | Est. mass, g              | 0.03   | 0.12   | 0.34   | 0.77   | 1.54   | 2.75   | 4.56   | 7.12   | 10.60  | 15.18  | 28.46  | 48.69  | 77.79  | 117.85 | 171.13 | --- | --- |
|                 | Number                    | 1      | 2      | 3      | 4      | 5      | 6      | 7      | 8      | 9      | 10     | 11     | 12     | 13     | 14     | 15     | 16  | 17  |
|                 | Size, mm                  | 0.92   | 0.92   | 0.92   | 0.92   | 0.92   | 0.92   | 0.92   | 0.92   | 0.92   | 0.92   | 1.84   | 1.84   | 1.84   | 1.84   | ---    | --- | --- |
|                 | C:N ratio                 | 3.66   | 3.64   | 3.58   | 3.40   | 3.30   | 3.12   | 3.24   | 3.11   | 3.13   | 3.18   | 3.18   | 3.33   | 3.49   | 3.86   | ---    | --- | --- |
|                 | $\delta^{13}\text{C}$ , ‰ | -20.98 | -20.88 | -20.96 | -20.19 | -20.14 | -19.58 | -19.64 | -19.41 | -19.63 | -19.64 | -19.56 | -19.66 | -19.98 | -19.78 | ---    | --- | --- |
|                 | $\delta^{15}\text{N}$ , ‰ | 9.53   | 9.49   | 10.58  | 10.62  | 12.58  | 13.69  | 14.03  | 14.72  | 14.48  | 15.43  | 14.92  | 14.80  | 14.56  | 13.82  | ---    | --- | --- |
|                 | TL                        | 3.77   | 3.76   | 4.05   | 4.06   | 4.57   | 4.87   | 4.95   | 5.14   | 5.07   | 5.32   | 5.19   | 5.16   | 5.09   | 4.90   | ---    | --- | --- |
| M4              | Est. ML, mm               | 7.1    | 11.8   | 17.7   | 24.3   | 31.7   | 39.8   | 48.3   | 57.4   | 66.9   | 76.9   | 98.0   | 120.7  | 144.6  | 169.8  | 196.1  | --- | --- |
|                 | Est. mass, g              | 0.03   | 0.12   | 0.34   | 0.77   | 1.54   | 2.75   | 4.56   | 7.12   | 10.60  | 15.18  | 28.46  | 48.69  | 77.79  | 117.85 | 171.13 | --- | --- |
| M4              | Number                    | 1      | 2      | 3      | 4      | 5      | 6      | 7      | 8      | 9      | 10     | 11     | 12     | 13     | 14     | 15     | 16  | 17  |
|                 | Size, mm                  | 0.92   | 0.92   | 0.92   | 0.92   | 0.92   | 0.92   | 0.92   | 0.92   | 0.92   | 0.92   | 1.84   | 1.84   | 1.84   | 1.84   | ---    | --- | --- |

|    |                           |        |        |        |        |        |        |        |        |        |        |        |        |        |        |        |        |        |
|----|---------------------------|--------|--------|--------|--------|--------|--------|--------|--------|--------|--------|--------|--------|--------|--------|--------|--------|--------|
|    | Size, mm                  | 0.96   | 0.96   | 0.96   | 0.96   | 0.96   | 0.96   | 0.96   | 0.96   | 0.96   | 0.96   | 0.96   | 1.75   | 1.75   | 1.75   | 1.75   | 1.75   | ---    |
|    | C:N ratio                 | 3.57   | 3.52   | 3.46   | n/a    | 3.35   | 3.18   | 3.13   | 3.18   | 3.22   | 3.21   | 3.16   | 3.21   | 3.25   | 3.45   | 3.44   | 3.71   | ---    |
|    | $\delta^{13}\text{C}$ , ‰ | -20.35 | -20.04 | -19.72 | n/a    | -19.13 | -18.50 | -18.80 | -19.05 | -18.94 | -18.83 | -18.46 | -18.17 | -18.32 | -18.98 | -19.09 | -19.33 | ---    |
|    | $\delta^{15}\text{N}$ , ‰ | 5.56   | 5.74   | 6.51   | n/a    | 8.19   | 9.98   | 10.74  | 10.70  | 10.70  | 11.17  | 11.54  | 11.22  | 11.11  | 10.78  | 10.50  | 10.07  | ---    |
|    | TL                        | 3.02   | 3.06   | 3.27   | n/a    | 3.71   | 4.18   | 4.38   | 4.37   | 4.37   | 4.49   | 4.59   | 4.50   | 4.48   | 4.39   | 4.32   | 4.20   | ---    |
|    | Est. ML, mm               | 7.3    | 12.3   | 18.5   | 25.6   | 33.4   | 41.9   | 51.0   | 60.7   | 70.8   | 81.4   | 92.4   | 113.5  | 135.9  | 159.4  | 184.0  | 209.5  | 236.1  |
|    | Est. mass, g              | 0.03   | 0.13   | 0.38   | 0.88   | 1.76   | 3.16   | 5.25   | 8.21   | 12.25  | 17.57  | 24.40  | 41.57  | 66.21  | 100.06 | 145.01 | 203.10 | 276.48 |
|    | Number                    | 1      | 2      | 3      | 4      | 5      | 6      | 7      | 8      | 9      | 10     | 11     | 12     | 13     | 14     | 15     | 16     | 17     |
|    | Size, mm                  | 0.97   | 0.97   | 0.97   | 0.97   | 0.97   | 0.97   | 0.97   | 0.97   | 0.97   | 1.75   | 1.75   | 1.75   | 1.75   | 1.75   | ---    | ---    | ---    |
|    | C:N ratio                 | n/a    | ---    | ---    | ---    |
| M5 | $\delta^{13}\text{C}$ , ‰ | -19.35 | -19.26 | -19.63 | -18.98 | -19.11 | -18.91 | -19.11 | -19.13 | -19.18 | -19.36 | -19.43 | -19.28 | -19.09 | -19.24 | ---    | ---    | ---    |
|    | $\delta^{15}\text{N}$ , ‰ | 8.39   | 8.28   | 6.38   | 8.49   | 10.19  | 9.88   | 11.80  | 11.72  | 11.78  | 12.33  | 12.28  | 11.49  | 11.07  | 10.14  | ---    | ---    | ---    |
|    | TL                        | 3.55   | 3.52   | 3.02   | 3.58   | 4.02   | 3.94   | 4.45   | 4.43   | 4.44   | 4.59   | 4.57   | 4.37   | 4.25   | 4.01   | ---    | ---    | ---    |
|    | Est. ML, mm               | 7.3    | 12.4   | 18.7   | 25.9   | 33.9   | 42.5   | 51.7   | 61.5   | 71.8   | 91.4   | 112.5  | 134.8  | 158.3  | 182.8  | ---    | ---    | ---    |
|    | Est. mass, g              | 0.03   | 0.14   | 0.39   | 0.91   | 1.82   | 3.27   | 5.44   | 8.51   | 12.69  | 23.77  | 40.64  | 64.89  | 98.28  | 142.69 | ---    | ---    | ---    |
|    | Number                    | 1      | 2      | 3      | 4      | 5      | 6      | 7      | 8      | 9      | 10     | 11     | 12     | 13     | 14     | 15     | 16     | 17     |
|    | Size, mm                  | 0.99   | 0.99   | 0.99   | 0.99   | 0.99   | 0.99   | 0.99   | 0.99   | 0.99   | 0.99   | 1.98   | 1.98   | 1.98   | 1.98   | 1.98   | ---    | ---    |
|    | C:N ratio                 | 3.54   | 3.63   | 3.62   | 3.40   | 3.28   | 3.38   | 3.19   | 3.14   | 3.26   | 3.22   | 3.21   | 3.13   | 3.20   | 3.23   | 3.65   | ---    | ---    |
|    | $\delta^{13}\text{C}$ , ‰ | -20.75 | -20.40 | -20.35 | -19.70 | -19.39 | -19.73 | -19.28 | -19.42 | -19.43 | -19.54 | -19.55 | -19.45 | -19.31 | -19.20 | -19.64 | ---    | ---    |
|    | $\delta^{15}\text{N}$ , ‰ | 11.09  | 11.74  | 12.49  | 13.39  | 14.07  | 14.30  | 14.97  | 15.16  | 15.45  | 15.57  | 15.53  | 16.15  | 16.58  | 16.42  | 14.27  | ---    | ---    |
| M6 | TL                        | 3.84   | 4.01   | 4.21   | 4.44   | 4.62   | 4.68   | 4.86   | 4.91   | 4.99   | 5.02   | 5.01   | 5.17   | 5.28   | 5.24   | 4.68   | ---    | ---    |
|    | Est. ML, mm               | 7.4    | 12.7   | 19.1   | 26.5   | 34.7   | 43.6   | 53.1   | 63.1   | 73.7   | 84.8   | 108.2  | 133.3  | 159.8  | 187.7  | 216.9  | ---    | ---    |
|    | Est. mass, g              | 0.04   | 0.14   | 0.41   | 0.97   | 1.94   | 3.49   | 5.82   | 9.11   | 13.60  | 19.53  | 36.72  | 62.96  | 100.73 | 152.76 | 222.01 | ---    | ---    |
|    | Number                    | 1      | 2      | 3      | 4      | 5      | 6      | 7      | 8      | 9      | 10     | 11     | 12     | 13     | 14     | 15     | 16     | 17     |
|    | Size, mm                  | 0.98   | 0.98   | 0.98   | 0.98   | 0.98   | 0.98   | 0.98   | 0.98   | 0.98   | 0.98   | 0.98   | 1.80   | 1.80   | 1.80   | 1.80   | 1.80   | 1.80   |
|    | C:N ratio                 | n/a    | n/a    | n/a    | 3.27   | n/a    | n/a    | 3.13   | n/a    | 3.29   | n/a    | 3.23   |
|    | $\delta^{13}\text{C}$ , ‰ | n/a    | n/a    | n/a    | -19.29 | n/a    | n/a    | -19.10 | n/a    | -19.13 | n/a    | -19.46 |
|    | $\delta^{15}\text{N}$ , ‰ | n/a    | 10.98  | 10.30  | 11.91  | 12.29  | 12.73  | 15.31  | 14.80  | 15.39  | 15.17  | 14.65  | n/a    | 14.55  | 14.84  | 15.02  | n/a    | 15.25  |
|    | TL                        | n/a    | 4.23   | 4.05   | 4.48   | 4.58   | 4.69   | 5.37   | 5.24   | 5.39   | 5.34   | 5.20   | n/a    | 5.17   | 5.25   | 5.29   | n/a    | 5.36   |
|    | Est. ML, mm               | 7.4    | 12.5   | 18.9   | 26.2   | 34.3   | 43.0   | 52.4   | 62.3   | 72.7   | 83.6   | 95.0   | 116.9  | 140.1  | 164.5  | 190.0  | 216.6  | 244.1  |
|    | Est. mass, g              | 0.04   | 0.14   | 0.40   | 0.94   | 1.88   | 3.38   | 5.62   | 8.81   | 13.14  | 18.86  | 26.20  | 44.84  | 71.65  | 108.57 | 157.68 | 221.22 | 301.57 |
| M7 | Number                    | 1      | 2      | 3      | 4      | 5      | 6      | 7      | 8      | 9      | 10     | 11     | 12     | 13     | 14     | 15     | 16     | 17     |
|    | Size, mm                  | 0.96   | 0.96   | 0.96   | 0.96   | 0.96   | 0.96   | 0.96   | 0.96   | 0.96   | 0.96   | 0.96   | 1.75   | 1.75   | 1.75   | 1.75   | 1.75   | 1.75   |
|    | C:N ratio                 | 3.59   | n/a    | n/a    | 3.34   | 3.22   | 3.17   | 3.09   | 3.15   | 3.16   | n/a    | n/a    | n/a    | 3.19   | 3.16   | 3.14   | 3.45   | 3.72   |
|    | $\delta^{13}\text{C}$ , ‰ | -20.75 | n/a    | n/a    | -19.94 | -19.46 | -19.32 | -19.56 | -19.75 | -19.71 | n/a    | n/a    | n/a    | -19.44 | -19.55 | -19.65 | -19.78 | -19.94 |
|    | $\delta^{15}\text{N}$ , ‰ | 10.84  | 10.69  | 11.41  | 12.20  | 13.37  | 13.99  | 15.10  | 14.65  | 14.79  | n/a    | n/a    | n/a    | 14.92  | 14.72  | 14.80  | 14.18  | 13.50  |
|    | TL                        | 3.77   | 3.73   | 3.92   | 4.13   | 4.44   | 4.60   | 4.89   | 4.78   | 4.81   | n/a    | n/a    | n/a    | 4.85   | 4.80   | 4.82   | 4.65   | 4.47   |
|    | Est. ML, mm               | 7.3    | 12.3   | 18.5   | 25.6   | 33.4   | 41.9   | 51.0   | 60.7   | 70.8   | 81.4   | 92.4   | 113.5  | 135.9  | 159.4  | 184.0  | 209.5  | 236.1  |
|    | Est. mass, g              | 0.03   | 0.13   | 0.38   | 0.88   | 1.76   | 3.16   | 5.25   | 8.21   | 12.25  | 17.57  | 24.40  | 41.57  | 66.21  | 100.06 | 145.01 | 203.10 | 276.48 |
|    | Number                    | 1      | 2      | 3      | 4      | 5      | 6      | 7      | 8      | 9      | 10     | 11     | 12     | 13     | 14     | 15     | 16     | 17     |
|    | Size, mm                  | 0.96   | 0.96   | 0.96   | 0.96   | 0.96   | 0.96   | 0.96   | 0.96   | 0.96   | 0.96   | 0.96   | 1.75   | 1.75   | 1.75   | 1.75   | 1.75   | 1.75   |
|    | C:N ratio                 | 3.59   | n/a    | n/a    | 3.34   | 3.22   | 3.17   | 3.09   | 3.15   | 3.16   | n/a    | n/a    | n/a    | 3.19   | 3.16   | 3.14   | 3.45   | 3.72   |
| M8 | $\delta^{13}\text{C}$ , ‰ | -20.75 | n/a    | n/a    | -19.94 | -19.46 | -19.32 | -19.56 | -19.75 | -19.71 | n/a    | n/a    | n/a    | -19.44 | -19.55 | -19.65 | -19.78 | -19.94 |
|    | $\delta^{15}\text{N}$ , ‰ | 10.84  | 10.69  | 11.41  | 12.20  | 13.37  | 13.99  | 15.10  | 14.65  | 14.79  | n/a    | n/a    | n/a    | 14.92  | 14.72  | 14.80  | 14.18  | 13.50  |
|    | TL                        | 3.77   | 3.73   | 3.92   | 4.13   | 4.44   | 4.60   | 4.89   | 4.78   | 4.81   | n/a    | n/a    | n/a    | 4.85   | 4.80   | 4.82   | 4.65   | 4.47   |
|    | Est. ML, mm               | 7.3    | 12.3   | 18.5   | 25.6   | 33.4   | 41.9   | 51.0   | 60.7   | 70.8   | 81.4   | 92.4   | 113.5  | 135.9  | 159.4  | 184.0  | 209.5  | 236.1  |
|    | Est. mass, g              | 0.03   | 0.13   | 0.38   | 0.88   | 1.76   | 3.16   | 5.25   | 8.21   | 12.25  | 17.57  | 24.40  | 41.57  | 66.21  | 100.06 | 145.01 | 203.10 | 276.48 |
|    | Number                    | 1      | 2      | 3      | 4      | 5      | 6      | 7      | 8      | 9      | 10     | 11     | 12     | 13     | 14     | 15     | 16     | 17     |
|    | Size, mm                  | 0.96   | 0.96   | 0.96   | 0.96   | 0.96   | 0.96   | 0.96   | 0.96   | 0.96   | 0.96   | 0.96   | 1.75   | 1.75   | 1.75   | 1.75   | 1.75   | 1.75   |
|    | C:N ratio                 | 3.59   | n/a    | n/a    | 3.34   | 3.22   | 3.17   | 3.09   | 3.15   | 3.16   | n/a    | n/a    | n/a    | 3.19   | 3.16   | 3.14   | 3.45   | 3.72   |
|    | $\delta^{13}\text{C}$ , ‰ | -20.75 | n/a    | n/a    | -19.94 | -19.46 | -19.32 | -19.56 | -19.75 | -19.71 | n/a    | n/a    | n/a    | -19.44 | -19.55 | -19.65 | -19.78 | -19.94 |
|    | $\delta^{15}\text{N}$ , ‰ | 10.84  | 10.69  | 11.41  | 12.20  | 13.37  | 13.99  | 15.10  | 14.65  | 14.79  | n/a    | n/a    | n/a    | 14.92  | 14.72  | 14.80  | 14.18  | 13.50  |
|    | TL                        | 3.77   | 3.73   | 3.92   | 4.13   | 4.44   | 4.60   | 4.89   | 4.78   | 4.81   | n/a    | n/a    | n/a    | 4.85   | 4.80   | 4.82   | 4.65   | 4.47   |
|    | Est. ML, mm               | 7.3    | 12.3   | 18.5   | 25.6   | 33.4   | 41.9   | 51.0   | 60.7   | 70.8   | 81.4   | 92.4   | 113.5  | 135.9  | 159.4  | 184.0  | 209.5  | 236.1  |
|    | Est. mass, g              | 0.03   | 0.13   | 0.38   | 0.88   | 1.76   | 3.16   | 5.25   | 8.21   | 12.25  | 17.57  | 24.40  | 41.57  | 66.21  | 100.06 | 145.01 | 203.10 | 276.48 |

<sup>1</sup>gelatinous degeneration.

**Table S3.** Equations to estimate mantle length and mass of *Gonatus fabricii* from upper beak rostrum length. Significant *p*-values are in **bold**. ML – mantle length, URL – upper beak rostrum length, *n* – sample size.

| Area                   | ML                                                                                                         | Mass                                                                                                        | Source              |
|------------------------|------------------------------------------------------------------------------------------------------------|-------------------------------------------------------------------------------------------------------------|---------------------|
| Arctic<br>(in general) | ML = 30.91*URL <sup>1.06</sup> ,<br><i>n</i> = 208, <i>R</i> <sup>2</sup> = 0.88, <i>p</i> = <b>0.0001</b> | Mass = 1.50*URL <sup>2.66</sup> ,<br><i>n</i> = 208, <i>R</i> <sup>2</sup> = 0.89, <i>p</i> = <b>0.0001</b> | This study          |
| West Greenland         | ML = 26.86*URL <sup>1.18</sup> ,<br><i>n</i> = 124, <i>R</i> <sup>2</sup> = 0.93, <i>p</i> = <b>0.0001</b> | Mass = 0.93*URL <sup>3.00</sup> ,<br><i>n</i> = 124, <i>R</i> <sup>2</sup> = 0.95, <i>p</i> = <b>0.0001</b> | This study          |
| East Greenland         | ML = 27.79*URL <sup>0.96</sup> ,<br><i>n</i> = 29, <i>R</i> <sup>2</sup> = 0.93, <i>p</i> = <b>0.0100</b>  | Mass = 1.73*URL <sup>2.24</sup> ,<br><i>n</i> = 29, <i>R</i> <sup>2</sup> = 0.97, <i>p</i> = <b>0.0090</b>  | Golikov et al. 2018 |
| Barents Sea            | ML = 38.22*URL <sup>0.88</sup> ,<br><i>n</i> = 67, <i>R</i> <sup>2</sup> = 0.95, <i>p</i> = <b>0.0100</b>  | Mass = 2.71*URL <sup>2.16</sup> ,<br><i>n</i> = 67, <i>R</i> <sup>2</sup> = 0.97, <i>p</i> = <b>0.0090</b>  | Golikov et al. 2018 |

**Table S4.** Values of  $\delta^{13}\text{C}$  and  $\delta^{15}\text{N}$  for the prey group sources used in Bayesian mixing model SIMMR0.4.5. Values are mean  $\pm$  SD.  $n$  – sample size, --- – not applicable.

| Prey sources <sup>1</sup> |                           | Subsections 1–3                 | Subsections 4–5                 | Subsections 7–9;<br>subsection 10 |
|---------------------------|---------------------------|---------------------------------|---------------------------------|-----------------------------------|
| Copepoda                  | $\delta^{13}\text{C}$ , ‰ | $n = 75$ ,<br>$-20.93 \pm 1.00$ | $n = 75$ ,<br>$-20.93 \pm 1.00$ | $n = 75$ ,<br>$-20.93 \pm 1.00$   |
|                           | $\delta^{15}\text{N}$ , ‰ | $n = 84$ ,<br>$8.49 \pm 1.19$   | $n = 84$ ,<br>$8.49 \pm 1.19$   | $n = 84$ ,<br>$8.49 \pm 1.19$     |
| Euphausiacea              | $\delta^{13}\text{C}$ , ‰ | $n = 34$ ,<br>$-20.83 \pm 1.13$ | $n = 34$ ,<br>$-20.83 \pm 1.13$ | $n = 34$ ,<br>$-20.83 \pm 1.13$   |
|                           | $\delta^{15}\text{N}$ , ‰ | $n = 34$ ,<br>$9.71 \pm 1.21$   | $n = 34$ ,<br>$9.71 \pm 1.21$   | $n = 34$ ,<br>$9.71 \pm 1.21$     |
| Shrimps                   | $\delta^{13}\text{C}$ , ‰ | $n = 22$ ,<br>$-17.90 \pm 0.98$ | $n = 22$ ,<br>$-17.90 \pm 0.98$ | $n = 22$ ,<br>$-17.90 \pm 0.98$   |
|                           | $\delta^{15}\text{N}$ , ‰ | $n = 22$ ,<br>$11.48 \pm 1.65$  | $n = 22$ ,<br>$11.48 \pm 1.65$  | $n = 22$ ,<br>$11.48 \pm 1.65$    |
| Chaetognatha              | $\delta^{13}\text{C}$ , ‰ | $n = 35$ ,<br>$-18.56 \pm 7.64$ | $n = 35$ ,<br>$-18.56 \pm 7.64$ | $n = 35$ ,<br>$-18.56 \pm 7.64$   |
|                           | $\delta^{15}\text{N}$ , ‰ | $n = 36$ ,<br>$11.91 \pm 1.93$  | $n = 36$ ,<br>$11.91 \pm 1.93$  | $n = 36$ ,<br>$11.91 \pm 1.93$    |
| Cephalopoda               | $\delta^{13}\text{C}$ , ‰ | --- <sup>2</sup>                | $n = 35$ ,<br>$-20.28 \pm 0.69$ | $n = 57$ ,<br>$-19.98 \pm 0.69$   |
|                           | $\delta^{15}\text{N}$ , ‰ | --- <sup>2</sup>                | $n = 35$ ,<br>$12.84 \pm 1.57$  | $n = 57$ ,<br>$14.48 \pm 2.66$    |
| Fishes                    | $\delta^{13}\text{C}$ , ‰ | --- <sup>2</sup>                | $n = 30$ ,<br>$-20.21 \pm 0.66$ | $n = 51$ ,<br>$-20.11 \pm 0.80$   |
|                           | $\delta^{15}\text{N}$ , ‰ | --- <sup>2</sup>                | $n = 30$ ,<br>$11.61 \pm 1.12$  | $n = 51$ ,<br>$11.87 \pm 1.33$    |
| Cephalopoda<br>+ fishes   | $\delta^{13}\text{C}$ , ‰ | $n = 39$ ,<br>$-20.44 \pm 0.67$ | --- <sup>2</sup>                | --- <sup>2</sup>                  |
|                           | $\delta^{15}\text{N}$ , ‰ | $n = 39$ ,<br>$11.73 \pm 1.22$  | --- <sup>2</sup>                | --- <sup>2</sup>                  |

<sup>1</sup>Pomerleau et al. (2011, 2016) [97,110], Hansen et al. (2012) [96], Agersted et al. (2014) [111],

Linnebjerg et al. (2016) [94], Golikov et al. (2018) [27], Grigor et al. (2020) [101] and this study;

<sup>2</sup>source values are not significantly different, thus, Cephalopoda and fishes are combined in this case.

**Table S5.** Differences in values of  $\delta^{13}\text{C}$  and  $\delta^{15}\text{N}$  for the prey group sources used in Bayesian mixing model SIMMR 0.4.5. Kruskal–Wallis  $H$  and Dunn’s  $Z$  tests are provided in the table. Significant  $p$ -values are in **bold**. --- – not applicable.

| $\delta^{13}\text{C}$                                               |              |              |              |              |                                   | $\delta^{15}\text{N}$                                               |              |              |              |              |                                   |              |             |
|---------------------------------------------------------------------|--------------|--------------|--------------|--------------|-----------------------------------|---------------------------------------------------------------------|--------------|--------------|--------------|--------------|-----------------------------------|--------------|-------------|
| Subsections 1–3: $H_{4,205} = 84.91, p < 0.0001$                    |              |              |              |              |                                   | Subsections 1–3: $H_{4,215} = 119.70, p < 0.0001$                   |              |              |              |              |                                   |              |             |
| Prey source                                                         | Copepoda     | Euphausiacea | Shrimps      | Chaetognatha | Cephalopoda + Fishes <sup>1</sup> | Prey source                                                         | Copepoda     | Euphausiacea | Shrimps      | Chaetognatha | Cephalopoda + Fishes <sup>1</sup> |              |             |
| Copepoda                                                            | ---          | $Z = 0.37$   | $Z = 8.10.5$ | $Z = 5.40$   | $Z = 2.18$                        | Copepoda                                                            | ---          | $Z = 3.18$   | $Z = 6.24$   | $Z = 8.30$   | $Z = 8.53$                        |              |             |
| Euphausiacea                                                        | $p = 0.71$   | ---          | $Z = 6.90$   | $Z = 4.27$   | $Z = 1.50$                        | Euphausiacea                                                        | $p = 0.0017$ | ---          | $Z = 3.13$   | $Z = 4.25$   | $Z = 4.33$                        |              |             |
| Shrimps                                                             | $p < 0.0001$ | $p < 0.0001$ | ---          | $Z = 3.16$   | $Z = 5.75$                        | Shrimps                                                             | $p < 0.0001$ | $p = 0.0017$ | ---          | $Z = 0.59$   | $Z = 0.60$                        |              |             |
| Chaetognatha                                                        | $p < 0.0001$ | $p < 0.0001$ | $p = 0.0016$ | ---          | $Z = 2.90$                        | Chaetognatha                                                        | $p < 0.0001$ | $p < 0.0001$ | $p = 0.56$   | ---          | $Z = 0.001$                       |              |             |
| Cephalopoda + Fishes <sup>1</sup>                                   | $p = 0.0294$ | $p = 0.13$   | $p < 0.0001$ | $p = 0.0038$ | ---                               | Cephalopoda + Fishes <sup>1</sup>                                   | $p < 0.0001$ | $p < 0.0001$ | $p = 0.55$   | $p = 0.99$   | ---                               |              |             |
| Subsections 4–5: $H_{5,231} = 92.79, p < 0.0001$                    |              |              |              |              |                                   | Subsections 4–5: $H_{5,241} = 145.50, p < 0.0001$                   |              |              |              |              |                                   |              |             |
| Prey source                                                         | Copepoda     | Euphausiacea | Shrimps      | Chaetognatha | Cephalopoda                       | Fishes                                                              | Prey source  | Copepoda     | Euphausiacea | Shrimps      | Chaetognatha                      | Cephalopoda  | Fishes      |
| Copepoda                                                            | ---          | $Z = 0.45$   | $Z = 8.46$   | $Z = 5.68$   | $Z = 2.95$                        | $Z = 3.00$                                                          | Copepoda     | ---          | $Z = 2.84$   | $Z = 5.92$   | $Z = 8.04$                        | $Z = 9.72$   | $Z = 7.16$  |
| Euphausiacea                                                        | $p = 0.65$   | ---          | $Z = 7.16$   | $Z = 4.45$   | $Z = 2.13$                        | $Z = 2.19$                                                          | Euphausiacea | $p = 0.0045$ | ---          | $Z = 3.07$   | $Z = 4.28$                        | $Z = 5.72$   | $Z = 3.77$  |
| Shrimps                                                             | $p < 0.0001$ | $p < 0.0001$ | ---          | $Z = 3.27$   | $Z = 5.32$                        | $Z = 5.02$                                                          | Shrimps      | $p < 0.0001$ | $p = 0.0022$ | ---          | $Z = 0.68$                        | $Z = 1.97$   | $Z = 0.38$  |
| Chaetognatha                                                        | $p < 0.0001$ | $p < 0.0001$ | $p = 0.0011$ | ---          | $Z = 2.34$                        | $Z = 2.10$                                                          | Chaetognatha | $p < 0.0001$ | $p < 0.0001$ | $p = 0.50$   | ---                               | $Z = 1.49$   | $Z = 0.32$  |
| Cephalopoda                                                         | $p = 0.0032$ | $p = 0.0339$ | $p < 0.0001$ | $p = 0.0195$ | ---                               | $Z = 0.15$                                                          | Cephalopoda  | $p < 0.0001$ | $p < 0.0001$ | $p = 0.0484$ | $p = 0.14$                        | ---          | $Z = 2.01$  |
| Fishes                                                              | $p = 0.0030$ | $p = 0.0284$ | $p < 0.0001$ | $p = 0.0361$ | $p = 0.88$                        | ---                                                                 | Fishes       | $p < 0.0001$ | $p = 0.0002$ | $p = 0.71$   | $p = 0.75$                        | $p = 0.0428$ | ---         |
| Subsections 7–9 and subsection 10: $H_{5,274} = 106.30, p < 0.0001$ |              |              |              |              |                                   | Subsections 7–9 and subsection 10: $H_{5,284} = 184.30, p < 0.0001$ |              |              |              |              |                                   |              |             |
| Prey source                                                         | Copepoda     | Euphausiacea | Shrimps      | Chaetognatha | Cephalopoda                       | Fishes                                                              | Prey source  | Copepoda     | Euphausiacea | Shrimps      | Chaetognatha                      | Cephalopoda  | Fishes      |
| Copepoda                                                            | ---          | $Z = 0.50$   | $Z = 8.93$   | $Z = 5.79$   | $Z = 5.14$                        | $Z = 3.90$                                                          | Copepoda     | ---          | $Z = 2.51$   | $Z = 5.38$   | $Z = 7.38$                        | $Z = 12.35$  | $Z = 8.28$  |
| Euphausiacea                                                        | $p = 0.62$   | ---          | $Z = 7.54$   | $Z = 4.49$   | $Z = 3.69$                        | $Z = 2.73$                                                          | Euphausiacea | $p < 0.0121$ | ---          | $Z = 2.85$   | $Z = 4.01$                        | $Z = 7.43$   | $Z = 4.34$  |
| Shrimps                                                             | $p < 0.0001$ | $p < 0.0001$ | ---          | $Z = 3.61$   | $Z = 5.03$                        | $Z = 5.72$                                                          | Shrimps      | $p < 0.0001$ | $p = 0.0044$ | ---          | $Z = 0.67$                        | $Z = 3.31$   | $Z = 0.71$  |
| Chaetognatha                                                        | $p < 0.0001$ | $p < 0.0001$ | $p = 0.0003$ | ---          | $Z = 1.31$                        | $Z = 2.17$                                                          | Chaetognatha | $p < 0.0001$ | $p < 0.0001$ | $p = 0.51$   | ---                               | $Z = 3.06$   | $Z = 0.003$ |
| Cephalopoda                                                         | $p < 0.0001$ | $p = 0.0002$ | $p < 0.0001$ | $p = 0.19$   | ---                               | $Z = 1.01$                                                          | Cephalopoda  | $p < 0.0001$ | $p < 0.0001$ | $p = 0.0009$ | $p = 0.0023$                      | ---          | $Z = 3.37$  |
| Fishes                                                              | $p < 0.0001$ | $p = 0.0063$ | $p < 0.0001$ | $p = 0.0298$ | $p = 0.31$                        | ---                                                                 | Fishes       | $p < 0.0001$ | $p < 0.0001$ | $p = 0.48$   | $p = 0.99$                        | $p = 0.0008$ | ---         |

<sup>1</sup>source values are not significantly different, thus, Cephalopoda and fishes are combined in this case.



**Table S6.** Spearman's rank correlation between  $\delta^{13}\text{C}$  and  $\delta^{15}\text{N}$  values in *Gonatus fabricii* at population and individual levels. Significant  $p$ -values are in **bold**.  $n$  – sample size.

| Parameter    | Population level                                   |                    |               |                    | Individual level |               |               |       |               |
|--------------|----------------------------------------------------|--------------------|---------------|--------------------|------------------|---------------|---------------|-------|---------------|
|              | West Greenland, East Greenland and the Barents Sea | West Greenland     | F1            | F2                 | F6               | M2            | M3            | M5    | M6            |
| $n^1$        | 118                                                | 57                 | 13            | 13                 | 15               | 11            | 14            | 14    | 15            |
| Spearman $r$ | 0.44                                               | 0.71               | 0.65          | 0.88               | 0.75             | 0.68          | 0.77          | -0.06 | 0.73          |
| $p$          | <b>&lt; 0.0001</b>                                 | <b>&lt; 0.0001</b> | <b>0.0165</b> | <b>&lt; 0.0001</b> | <b>0.0014</b>    | <b>0.0208</b> | <b>0.0012</b> | 0.83  | <b>0.0021</b> |

<sup>1</sup>individuals at population level, and upper beak subsections at individual level.

**Table S7.** Isotopic niche width, estimated in nicheROVER 1.1.0 for different upper beak subsections of *Gonatus fabricii*. Values are mean  $\pm$  SD.  $n$  – sample size.

| Parameter   | Subsection      |                 |                 |                 |                 |                 |                 |                 |                 |                 |                 |                 |                 |                 |
|-------------|-----------------|-----------------|-----------------|-----------------|-----------------|-----------------|-----------------|-----------------|-----------------|-----------------|-----------------|-----------------|-----------------|-----------------|
|             | 1               | 2               | 3               | 4               | 5               | 6               | 7               | 8               | 9               | 10              | 11              | 12              | 13              | 14              |
| $n$         | 11              | 12              | 13              | 13              | 14              | 12              | 13              | 12              | 13              | 12              | 13              | 10              | 12              | 9               |
| Niche width | 2.68 $\pm$ 0.78 | 3.53 $\pm$ 1.21 | 6.18 $\pm$ 1.95 | 4.51 $\pm$ 1.28 | 2.65 $\pm$ 0.79 | 4.28 $\pm$ 1.38 | 2.39 $\pm$ 0.63 | 1.54 $\pm$ 0.50 | 1.45 $\pm$ 0.45 | 1.74 $\pm$ 0.60 | 2.08 $\pm$ 0.67 | 3.04 $\pm$ 1.06 | 3.50 $\pm$ 1.21 | 2.82 $\pm$ 1.06 |

**Table S8.** Isotopic niches metrics (TA, SEA<sub>c</sub> and SEA<sub>b</sub>) and overlap in *Gonatus fabricii* across sexes, sizes and studied areas, estimated in SIBER 2.1.6. SEA<sub>b</sub> values are means  $\pm$  SD. Significant *p*-values are in **bold**. Significant overlap values are in **bold**. ML – mantle length, *n* – sample size, --- – not applicable.

| Parameter                   | Arctic <sup>1</sup><br>(ML 20–50 mm) |                 | Arctic <sup>1</sup><br>(ML > 50 mm) |                 | West Greenland<br>(ML > 50 mm) |                 | Females,<br>Arctic <sup>1</sup> |                 | Males,<br>Arctic <sup>1</sup> |                 |
|-----------------------------|--------------------------------------|-----------------|-------------------------------------|-----------------|--------------------------------|-----------------|---------------------------------|-----------------|-------------------------------|-----------------|
|                             | Females                              | Males           | Females                             | Males           | Females                        | Males           | ML 20–50 mm                     | ML > 50 mm      | ML 20–50 mm                   | ML > 50 mm      |
| <i>n</i>                    | 18                                   | 11              | 43                                  | 42              | 20                             | 20              | 18                              | 43              | 11                            | 42              |
| TA                          | 1.97                                 | 2.10            | 5.08                                | 5.62            | 2.17                           | 1.56            | 1.97                            | 4.33            | 2.10                          | 5.62            |
| SEA <sub>c</sub>            | 0.99                                 | 1.14            | 1.62                                | 1.51            | 0.87                           | 0.63            | 1.09                            | 1.57            | 1.14                          | 1.51            |
| SEA <sub>b</sub>            | 1.00 $\pm$ 0.25                      | 1.20 $\pm$ 0.40 | 1.63 $\pm$ 0.26                     | 1.51 $\pm$ 0.24 | 0.88 $\pm$ 0.21                | 0.63 $\pm$ 0.15 | 1.11 $\pm$ 0.29                 | 1.56 $\pm$ 0.28 | 1.20 $\pm$ 0.42               | 1.51 $\pm$ 0.23 |
| Group 1<br><i>p</i> -values | ---                                  | 0.66            | ---                                 | 0.36            | ---                            | 0.15            | ---                             | 0.88            | ---                           | 0.79            |
| Group 2<br><i>p</i> -values | 0.34                                 | ---             | 0.64                                | ---             | 0.85                           | ---             | 0.12                            | ---             | 0.21                          | ---             |
| Overlap, %                  | <b>80.47</b>                         | <b>73.08</b>    | <b>80.10</b>                        | <b>86.39</b>    | <b>71.61</b>                   | <b>99.16</b>    | 0.31                            | 0.21            | 19.98                         | 14.00           |

<sup>1</sup>West Greenland, East Greenland and the Barents Sea.

**Table S9.** Differences in predicted relative contribution of prey to the diet among different upper beak subsections of *Gonatus fabricii*, estimated in Bayesian mixing model SIMMR 0.4.5.  $\chi^2$  test and Fisher's exact test are provided in the table, above and below the diagonal, respectively. Significant *p*-values are in **bold**. --- – not applicable.

| Crustacea vs. Chaetognatha vs. Cephalopoda + fishes:<br>$\chi^2 = 6.56, d.f. = 6, p = 0.36$ |                        |                                     |                                     |                                     | Copepoda vs. Euphausiacea vs. shrimps:<br>$\chi^2 = 34.64, d.f. = 4, p < \mathbf{0.0001}$ |                                   |                                                 |                                                 |                                                 |
|---------------------------------------------------------------------------------------------|------------------------|-------------------------------------|-------------------------------------|-------------------------------------|-------------------------------------------------------------------------------------------|-----------------------------------|-------------------------------------------------|-------------------------------------------------|-------------------------------------------------|
| Subsections                                                                                 | 1–3                    | 4–5                                 | 7–9                                 | 10                                  | Subsections                                                                               | 1–3                               | 4–5                                             | 7–9                                             | 10                                              |
| 1–3                                                                                         | ---                    | $\chi^2 = 0.29, d.f. = 2, p = 0.87$ | $\chi^2 = 1.17, d.f. = 2, p = 0.56$ | $\chi^2 = 2.90, d.f. = 2, p = 0.23$ | 1–3                                                                                       | ---                               | $\chi^2 = 19.73, d.f. = 2, p < \mathbf{0.0001}$ | $\chi^2 = 28.23, d.f. = 2, p < \mathbf{0.0001}$ | $\chi^2 = 10.48, d.f. = 2, p = \mathbf{0.0053}$ |
| 4–5                                                                                         | Fisher's<br>$p = 0.87$ | ---                                 | $\chi^2 = 2.26, d.f. = 2, p = 0.32$ | $\chi^2 = 2.59, d.f. = 2, p = 0.27$ | 4–5                                                                                       | Fisher's<br>$p < \mathbf{0.0001}$ | ---                                             | $\chi^2 = 1.78, d.f. = 2, p = 0.41$             | $\chi^2 = 1.19, d.f. = 2, p = 0.55$             |
| 7–9                                                                                         | Fisher's<br>$p = 0.53$ | Fisher's<br>$p = 0.33$              | ---                                 | $\chi^2 = 2.52, d.f. = 2, p = 0.28$ | 7–9                                                                                       | Fisher's<br>$p < \mathbf{0.0001}$ | Fisher's<br>$p = 0.45$                          | ---                                             | $\chi^2 = 5.20, d.f. = 2, p = 0.07$             |
| 10                                                                                          | Fisher's<br>$p = 0.23$ | Fisher's<br>$p = 0.29$              | Fisher's<br>$p = 0.32$              | ---                                 | 10                                                                                        | Fisher's<br>$p = \mathbf{0.0062}$ | Fisher's<br>$p = 0.59$                          | Fisher's<br>$p = 0.09$                          | ---                                             |

**Figure S1.** Checking the data on *Gonatus fabricii* fitting to the prey group sources and trophic enrichment factors in SIMMR 0.4.5. Consumers (studied individuals; violet empty circles) and mean source signatures (see in-figure legend for reference) are shown. Exact values of sources and their standard deviations are in Table S3, trophic enrichment factors and their standard deviations are in Materials and methods.

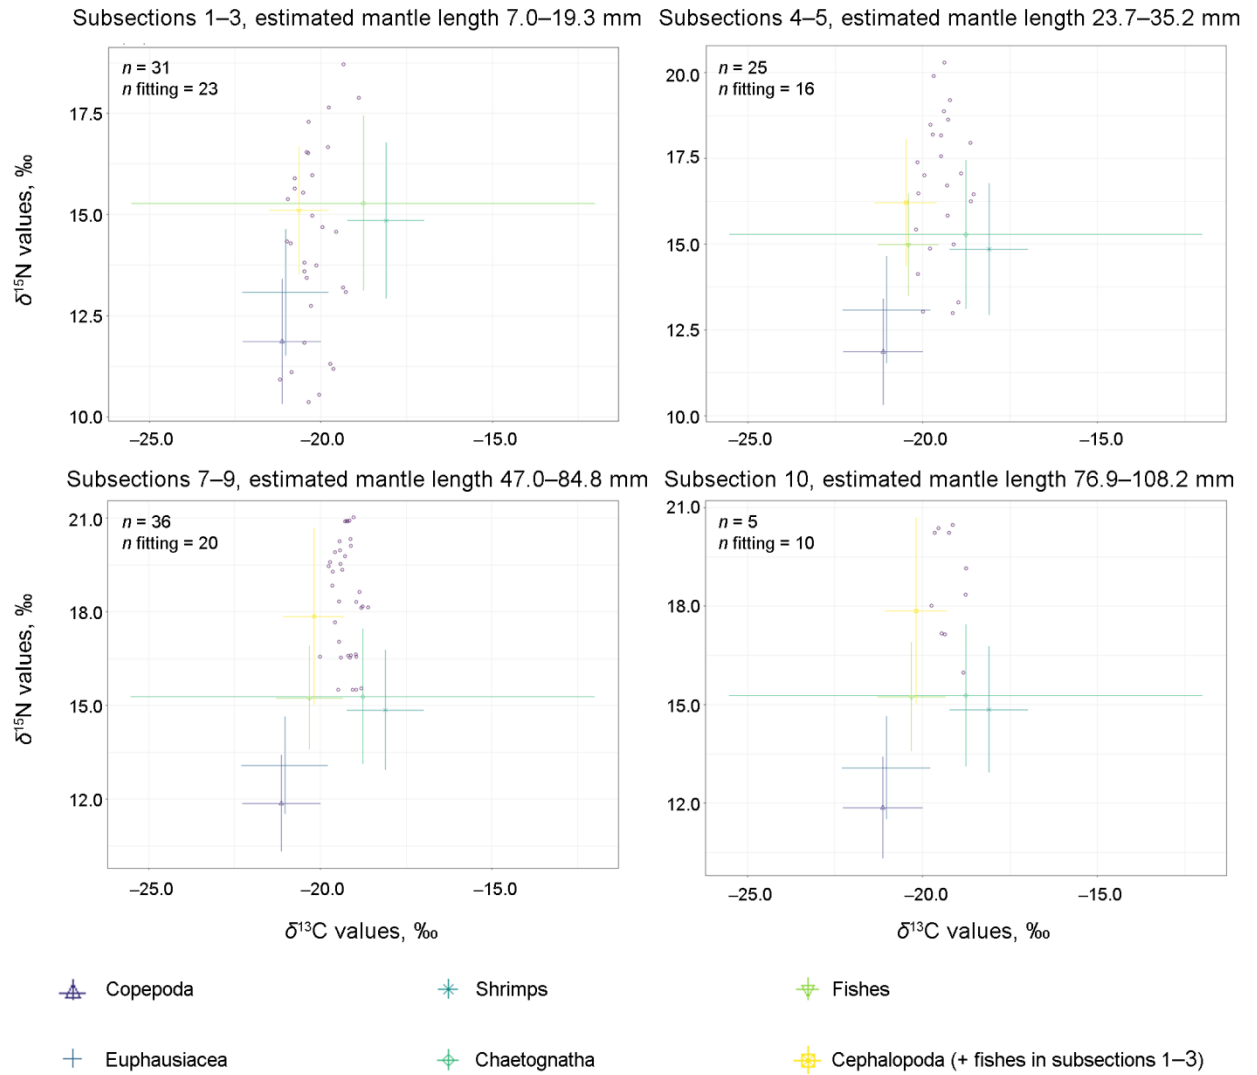

**Figure S2.** Isotopic niche overlap among the upper beak subsections of *Gonatus fabricii*, estimated in nicheROVER 1.1.0.

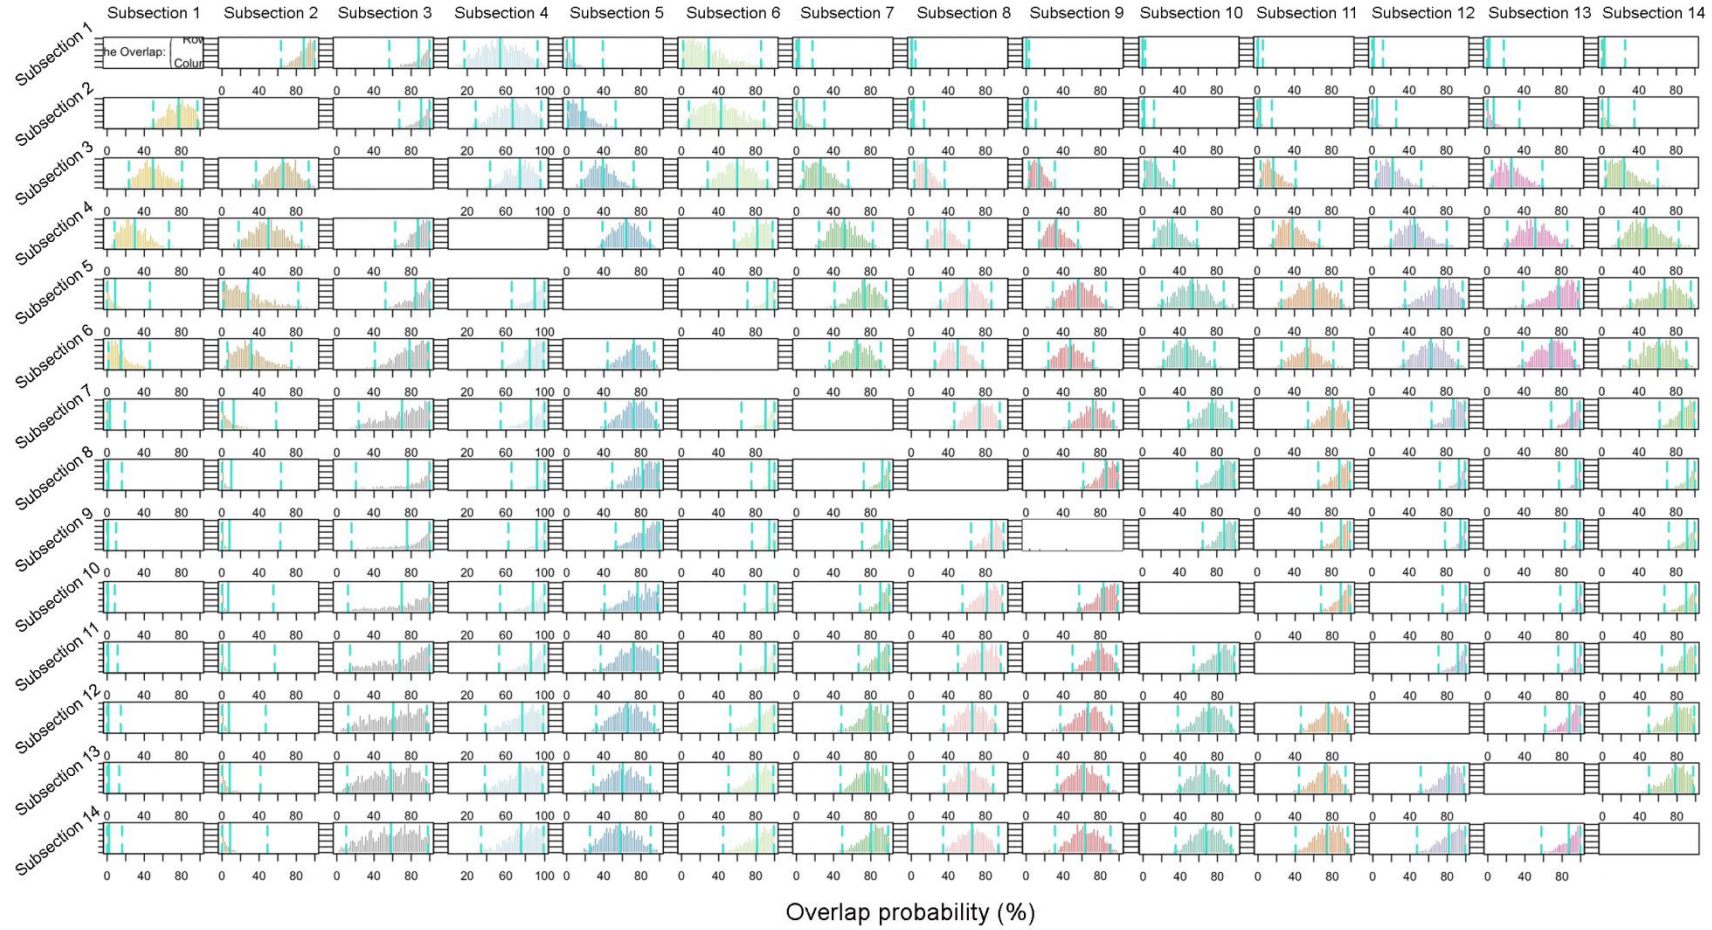

Supplement: s1 [file s1]
